# Supplementary material for: Oat Beta-Glucan as a Metabolic Regulator in Early Stage of Colorectal Cancer—A Model Study on Azoxymethane-Treated Rats
Source: MDPI journal article supplement (doi:10.3390/ijms25094635), 2024-04-24
Supplement: s1 [file s1]

**Table S1a.** The list of differentiated metabolic pathways in colon tissue of rats from **CRC** and **CON** groups.

| Pathway Name                               | Total | Hits (all) | Hits (sig.) | P-value | Gamma P |
|--------------------------------------------|-------|------------|-------------|---------|---------|
| Butanoate metabolism                       | 15    | 3          | 2           | 0.00022 | 0.02065 |
| Valine, leucine and isoleucine degradation | 35    | 13         | 3           | 0.00685 | 0.02292 |
| Fatty acid degradation                     | 36    | 14         | 3           | 0.09971 | 0.02652 |
| Steroid hormone biosynthesis               | 77    | 22         | 2           | 0.18582 | 0.03761 |
| Pentose phosphate pathway                  | 21    | 4          | 1           | 0.2474  | 0.04288 |
| Fatty acid elongation                      | 30    | 11         | 1           | 0.24547 | 0.04568 |
| Purine metabolism                          | 66    | 5          | 1           | 0.42173 | 0.07146 |
| Lysine degradation                         | 19    | 2          | 1           | 0.32974 | 0.07541 |
| Tryptophan metabolism                      | 41    | 2          | 1           | 0.61451 | 0.09207 |
| beta-Alanine metabolism                    | 21    | 4          | 1           | 0.45051 | 0.09222 |
| Sphingolipid metabolism                    | 9     | 2          | 1           | 0.45051 | 0.09222 |
| Propanoate metabolism                      | 19    | 4          | 1           | 0.55791 | 0.10957 |
| One carbon pool by folate                  | 9     | 6          | 1           | 0.55791 | 0.10957 |
| Riboflavin metabolism                      | 4     | 3          | 1           | 0.82401 | 0.11407 |
| Biotin metabolism                          | 4     | 1          | 1           | 0.7283  | 0.11545 |
| Folate biosynthesis                        | 24    | 4          | 1           | 0.77702 | 0.13848 |
| Retinol metabolism                         | 15    | 5          | 1           | 0.72546 | 0.14491 |

**Table S1b.** The list of significantly ( $p < 0.05$ ) regulated metabolites in colon tissue of rats from **CRC** and **CON** groups.

| Name                           | Pathway Name                               | Exact mass | P value  | FC   | logFC | Remarks                  |
|--------------------------------|--------------------------------------------|------------|----------|------|-------|--------------------------|
| 3-Methylcrotonyl-CoA           | Butanoate metabolism                       | 849.1571   | 0,01377  | 4,56 | 1,76  |                          |
| pentadecanoylcarnitine         | Valine, leucine and isoleucine degradation | 715,5012   | 0,0001   | 3,71 |       | Metabolite absent in CRC |
| Dehydroepiandrosterone sulfate | Fatty acid degradation                     | 284,4352   | 2,54E-05 | 3,66 | 0,56  |                          |
| 13,14-Dihydroxy-Retinol        | Steroid hormone biosynthesis               | 313,4533   | 2,54E-05 | 3,65 | 1,65  |                          |
| Thiopurine                     | Pentose phosphate pathway                  | 152,1772   | 2,54E-05 | 3,55 |       | Metabolite absent in CRC |
| Coproporphyrin I               | Fatty acid elongation                      | 197,1032   | 0,00138  | 3,49 | 0,55  |                          |
| Coproporphyrin III             | Purine metabolism                          | 300,4352   | 0,00138  | 3,38 |       | Metabolite absent in CRC |

|                                              |                         |          |          |      |      |                          |
|----------------------------------------------|-------------------------|----------|----------|------|------|--------------------------|
| S-(11-OH-9-deoxy-delta9,12-PGD2)-glutathione | Lysine degradation      | 398,6643 | 7,24E-08 | 3,34 | 0,77 |                          |
| S-(9-deoxy-delta12-PGD2)-glutathione         | Tryptophan metabolism   | 654,7083 | 0,00538  | 3,33 | 0,54 |                          |
| 10,11-dihydro-12R-hydroxy-LTC4               | beta-Alanine metabolism | 336,4652 | 1,59E-15 | 3,23 |      | Metabolite absent in CRC |
| Dehydroepiandrosterone sulfate               | Sphingolipid metabolism | 182,1732 | 0,00057  | 3,02 | 0,49 |                          |
| L-Fucose 1-phosphate                         | Propanoate metabolism   | 244,1361 | 0,00057  | 3,01 | 0,48 |                          |

**Table S2a.** The list of differentiated metabolic pathways in colon tissue of rats from **CRC** and **CRC\_BG\_1** groups.

| Pathway Name                                      | Total | Hits (all) | Hits (sig.) | P-value | Gamma P |
|---------------------------------------------------|-------|------------|-------------|---------|---------|
| Arachidonic acid metabolism                       | 95    | 26         | 2           | 0.85296 | 0.11185 |
| Linoleate metabolism                              | 46    | 10         | 1           | 0.72658 | 1.0     |
| Carnitine shuttle                                 | 72    | 1          | 1           | 0.11834 | 1.0     |
| Androgen and estrogen biosynthesis and metabolism | 95    | 22         | 1           | 0.94885 | 1.0     |
| Vitamin A (retinol) metabolism                    | 67    | 10         | 1           | 0.72658 | 1.0     |
| Glycerophospholipid metabolism                    | 156   | 6          | 1           | 0.53602 | 1.0     |
| Porphyrin metabolism                              | 43    | 9          | 1           | 0.68752 | 1.0     |
| Prostaglandin formation from arachidonate         | 78    | 9          | 1           | 0.68752 | 1.0     |
| Leukotriene metabolism                            | 92    | 9          | 1           | 0.68752 | 1.0     |
| C21-steroid hormone biosynthesis and metabolism   | 112   | 17         | 1           | 0.89537 | 1.0     |

**Table S2b.** The list of significantly ( $p < 0.05$ ) regulated metabolites in colon tissue of rats from **CRC** and **CRC\_BG\_1** groups.

| Name                                                    | Pathway Name                | Exact mass | P value | FC    | logFC | Remarks                      |
|---------------------------------------------------------|-----------------------------|------------|---------|-------|-------|------------------------------|
| 16(R)-HETE; 9(S)-HETE; 11,12-EET; 5(S)-HETE; 19(S)-HETE | Arachidonic acid metabolism | 320.2351   | 0,01409 | 57,70 | 1,76  |                              |
| pentadecanoylcarnitine                                  | Carnitine shuttle           | 385.6232   | 0,00003 | 3,65  |       | Metabolite absent in CRC_3BG |
| Dehydroepiandrosterone sulfate                          | Androgen and estrogen       | 368.1657   | 0,00138 | 3,60  | 0,56  |                              |

|                                              |                                                 |          |         |      |      |                              |
|----------------------------------------------|-------------------------------------------------|----------|---------|------|------|------------------------------|
|                                              | biosynthesis and metabolism                     |          |         |      |      |                              |
| 13,14-Dihydroxy-Retinol                      | Vitamin A (retinol) metabolism                  |          | 0,00138 | 3,60 | 0,56 |                              |
| 20-HETE                                      | Glycerophospholipid metabolism                  | 320.2351 | 0,00000 | 3,54 |      | Metabolite absent in CRC_3BG |
| Coproporphyrin I                             | Porphyrin metabolism                            | 654.269  | 0,00538 | 3,51 | 0,54 |                              |
| Coproporphyrin III                           |                                                 | 654.269  | 0,00000 | 3,33 |      | Metabolite absent in CRC_3BG |
| S-(11-OH-9-deoxy-delta9,12-PGD2)-glutathione | Prostaglandin formation from arachidonate       |          | 0,00057 | 3,02 | 0,48 |                              |
| S-(9-deoxy-delta12-PGD2)-glutathione         |                                                 |          | 0,00057 | 3,02 | 0,48 |                              |
| 10,11-dihydro-12R-hydroxy-LTC4               | Leukotriene metabolism                          |          | 0,00011 | 2,78 | 0,44 |                              |
| Dehydroepiandrosterone sulfate               | C21-steroid hormone biosynthesis and metabolism | 368.1657 | 0,00011 | 2,78 | 0,44 |                              |
|                                              |                                                 |          |         |      |      |                              |

**Table S3a.** The list of differentiated metabolic pathways in colon tissue of rats from **CRC** and **CRC\_BG\_3** groups.

| Pathway Name                                      | Total | Hits (all) | Hits (sig.) | P-value | Gamma P  |
|---------------------------------------------------|-------|------------|-------------|---------|----------|
| Aspartate and asparagine metabolism               | 114   | 3          | 2           | 0.15282 | 0.01631  |
| Methionine and cysteine metabolism                | 94    | 3          | 2           | 0.15282 | 0.01631  |
| Di-unsaturated fatty acid beta-oxidation          | 26    | 4          | 2           | 0.25783 | 0.023761 |
| Mono-unsaturated fatty acid beta-oxidation        | 19    | 4          | 2           | 0.25783 | 0.023761 |
| Leukotriene metabolism                            | 92    | 9          | 3           | 0.39493 | 0.025033 |
| Omega-6 fatty acid metabolism                     | 55    | 5          | 2           | 0.36394 | 0.032614 |
| Fatty acid activation                             | 74    | 6          | 2           | 0.46424 | 0.04268  |
| De novo fatty acid biosynthesis                   | 106   | 7          | 2           | 0.55508 | 0.053752 |
| Porphyrin metabolism                              | 43    | 8          | 2           | 0.6349  | 0.065621 |
| Prostaglandin formation from arachidonate         | 78    | 9          | 2           | 0.70346 | 0.078104 |
| Arachidonic acid metabolism                       | 95    | 26         | 4           | 0.93431 | 0.13341  |
| C21-steroid hormone biosynthesis and metabolism   | 112   | 17         | 2           | 0.95686 | 0.18603  |
| Androgen and estrogen biosynthesis and metabolism | 95    | 22         | 2           | 0.98914 | 0.25293  |
| Vitamin D3 (cholecalciferol) metabolism           | 16    | 1          | 1           | 0.24848 | 1.0      |
| Glycolysis and Gluconeogenesis                    | 49    | 1          | 1           | 0.24848 | 1.0      |
| C5-Branched dibasic acid metabolism               | 10    | 1          | 1           | 0.24848 | 1.0      |

|                                                   |    |    |   |         |     |
|---------------------------------------------------|----|----|---|---------|-----|
| Pyruvate Metabolism                               | 20 | 1  | 1 | 0.24848 | 1.0 |
| Linoleate metabolism                              | 46 | 10 | 1 | 0.94772 | 1.0 |
| Squalene and cholesterol biosynthesis             | 55 | 2  | 1 | 0.43636 | 1.0 |
| 3-oxo-10R-octadecatrienoate beta-oxidation        | 27 | 1  | 1 | 0.24848 | 1.0 |
| Vitamin B1 (thiamin) metabolism                   | 20 | 1  | 1 | 0.24848 | 1.0 |
| Histidine metabolism                              | 33 | 2  | 1 | 0.43636 | 1.0 |
| Propanoate metabolism                             | 31 | 1  | 1 | 0.24848 | 1.0 |
| Vitamin E metabolism                              | 54 | 4  | 1 | 0.6849  | 1.0 |
| Glycine, serine, alanine and threonine metabolism | 88 | 2  | 1 | 0.43636 | 1.0 |
| Drug metabolism - cytochrome P450                 | 53 | 1  | 1 | 0.24848 | 1.0 |
| Tryptophan metabolism                             | 94 | 1  | 1 | 0.24848 | 1.0 |
| Urea cycle/amino group metabolism                 | 85 | 1  | 1 | 0.24848 | 1.0 |
| Valine, leucine and isoleucine degradation        | 65 | 3  | 1 | 0.57814 | 1.0 |

**Table S3b.** The list of significantly ( $p < 0.05$ ) regulated metabolites in colon tissue of rats from **CRC** and **CRC\_BG\_3** groups.

| Name                                          | Pathway Name                                                                                                                               | Exact mass | P value  | FC       | logFC    | Remarks                                                   |
|-----------------------------------------------|--------------------------------------------------------------------------------------------------------------------------------------------|------------|----------|----------|----------|-----------------------------------------------------------|
| 2-Methoxy-17beta-estradiol                    | Androgen and estrogen biosynthesis and metabolism                                                                                          | 302.1883   | 6,59E-13 | 1,875365 | -1,52725 | negative value of logFC = lower metabolite content in CRC |
| 24,25,26,27-tetranor-23-oxo-hydroxyvitamin D3 | Vitamin D3 (cholecalciferol) metabolism                                                                                                    | 358.5143   | 1,91E-21 | 1,875365 | -1,52725 | negative value of logFC = lower metabolite content in CRC |
| 4-Androsten-11beta-ol-3,17-dione              | C21-steroid hormone biosynthesis and metabolism                                                                                            | 302.1882   | 4,10E-02 | 2,064939 | 0,314907 |                                                           |
| Acetyl-CoA                                    | Aspartate and asparagine metabolism, Methionine and cysteine metabolism, Di-unsaturated fatty acid beta-oxidation, Leukotriene metabolism, | 809.1258   |          |          |          | too many metabolic pathways involved                      |

|                                        |                                                                                                                                                                                                                                                                                                                                                                                                                                                                                     |          |          |          |          |  |
|----------------------------------------|-------------------------------------------------------------------------------------------------------------------------------------------------------------------------------------------------------------------------------------------------------------------------------------------------------------------------------------------------------------------------------------------------------------------------------------------------------------------------------------|----------|----------|----------|----------|--|
|                                        | Fatty acid activation,<br>Prostaglandin formation from arachidonate, Glycolysis and Gluconeogenesis, Pyruvate Metabolism, Squalene and cholesterol biosynthesis, Vitamin B1 (thiamin) metabolism, Histidine metabolism, Propanoate metabolism, Vitamin E metabolism, Glycine, serine, alanine and threonine metabolism, Tryptophan metabolism, Urea cycle/amino group metabolism, Valine, leucine and isoleucine degradation, Butanoate metabolism, Arginine and Proline Metabolism |          |          |          |          |  |
| Androstenedione                        | C21-steroid hormone biosynthesis and metabolism                                                                                                                                                                                                                                                                                                                                                                                                                                     | 286.1933 | 4,10E-02 | 2,064939 | 0,314907 |  |
| cis,cis-myristo-5,8-dienoyl coenzyme A | Di-unsaturated fatty acid beta-oxidation                                                                                                                                                                                                                                                                                                                                                                                                                                            |          | 4,10E-03 | 39,0332  | 1,591434 |  |
| Dehydroepiandrosterone sulfate         | C21-steroid hormone biosynthesis and metabolism                                                                                                                                                                                                                                                                                                                                                                                                                                     | 368.1657 | 4,10E-02 | 2,064939 | 0,314907 |  |

|                                |                                                   |          |          |          |          |                                                           |
|--------------------------------|---------------------------------------------------|----------|----------|----------|----------|-----------------------------------------------------------|
| Dehydroepiandrosterone sulfate | Androgen and estrogen biosynthesis and metabolism | 368.1657 | 5,99E-05 | 1,895738 | 0,277778 |                                                           |
| Elaidic acid                   | Fatty acid activation                             | 282.2559 | 5,23E-06 | 3,75822  |          | Metabolite absent in CRC_3BG                              |
| Glutathione disulfide          | Aspartate and asparagine metabolism               | 612.152  | 3,68E-05 | 49,83188 | 1,697507 |                                                           |
| Glutathione disulfide          | Methionine and cysteine metabolism                | 612.152  | 3,68E-05 | 49,83188 | 1,697507 |                                                           |
| Glutathione disulfide          | Arachidonic acid metabolism                       | 612.152  | 6,53E-07 | 2,76767  |          | Metabolite absent in CRC_3BG                              |
| Glutathione disulfide          | Linoleate metabolism                              | 612.152  | 1,23E-02 | 1,851779 | 0,267589 |                                                           |
| Glutathione disulfide          | Ascorbate (Vitamin C) and Aldarate Metabolism     | 612.152  | 2,81E-03 | 0,029699 | -1,52725 | negative value of logFC = lower metabolite content in CRC |
| Oleic acid                     | De novo fatty acid biosynthesis                   | 282.2559 | 6,59E-13 | 3,158659 |          | Metabolite absent in CRC_3BG                              |
| Tamoxifen                      | Drug metabolism - cytochrome P450                 | 371.2249 | 7,76E-03 | 1,636392 | 0,213887 |                                                           |
| Uroporphyrin I                 | Porphyrin metabolism                              | 830.2283 | 6,59E-13 | 3,158659 |          | Metabolite absent in CRC_3BG                              |
| Uroporphyrin III               | Porphyrin metabolism                              | 830.2283 | 1,64E-14 | 3,080682 |          | Metabolite absent in CRC_3BG                              |
